# Supplementary material for: Multi-Level Determinants of Parasitic Fly Infection in Forest Passerines
Source: PLoS One. 2013 Jul 10;8(7):e67104. doi: 10.1371/journal.pone.0067104 (PMC3707910; doi:10.1371/journal.pone.0067104)
Supplement: Table S2 — Terms included in the models at each hierarchical level. (DOC) [file pone.0067104.s002.doc]

**Supporting Information.**

Table S2. Terms included in the models at each hierarchical level.

| Individual level | Microhabitat level | Community level |
| --- | --- | --- |
| *Random intercept* | | |
| IDnestling/IDnest | IDnest | - |
| *Response variable* | | |
| *Philornis* abundance (larvae/nestling) | Mean *Philornis* abundance (larvae/brood) | Mean *Philornis* abundance (larvae/10 nestlings at week*i*) |
| *Variables of interest* | | |
| host sp | brood sp | max.tempt0 – t6 |
| Age | nest type | min.tempt0 – t6 |
| age2 | o/c nest | hum2t0 – t6 |
| WBCt-1 - t-2 | external nest | hum14t0 – t6 |
| RBC t-1 - t-2 | Internal nest | rain t0 – t6 |
| bm t-1 - t-2 | height |  |
| tarsust-1 - t-2 | support | *Ph. ruber* dens t0 t-6 |
| score t-1 - t-2 | e/ne nestling | *Pn. sibilatrix* dens t0 t-6 |
| other ectoparasite |  | *Pi. sulphuratus* dens t0 t-6 |
|  | water | Pref dens t0 t-6 |
|  |  | Host dens t0 t-6 |
|  | tree sp | Non passerine dens t0 t-6 |
|  | cover tree | Shannon’s index t0 t-6 |
|  | tree height |  |
|  | (tree height)2 | L3 t0 t-6 |
|  | p/a shrubs |  |
|  | shrubs cover |  |
|  | shrub height |  |
|  | (shrub height)2 |  |
|  | p/a grass |  |
|  | cover grass |  |
|  | grass height |  |
|  | (grass height)2 |  |
|  |  |  |
| *Interactions* | | |
| age*RBC | Tree sp*tree height (lineal term) | Site*men.temp t-1 – t-6 |
| RBC*bm | Tree sp*tree height2(quadratic term) | Site*max.temp t-1 – t-6 |
| RBC*score | Tree sp*height of the nest | Site*min.temp t-1 – t-6 |
| host sp*bm t-1;t-2 | Brood sp*tree sp | Site*mean.hum t-1 – t-6 |
| host sp*WBC t-1;t-2 | Brood sp*tree height | Site*hum2 t-1 – t-6 |
| host sp*RBC t-1;t-2 | brood sp*external material | Site*hum14 t-1 – t-6 |
| host sp*score t-1;t-2 | brood sp*internal material | Site*rain t-1 – t-4 |
| host sp*age | Brood sp*bush cover | Site*pref dens t-1 – t-6 |
| host sp*age2 | Brood sp*p/a bush | Site**Ph.ruber* dens t-1 – t-6 |
| host sp*score*age | Brood sp*p/a grass | Site**Ph.sibilatrix* dens t-1 – t-6 |
| host sp*brood size | brood sp*height of nest | Site**Pi. sulphuratus* dens t-1 – t-6 |
| site* host sp *age |  | Site*L3 t-1 – t-6 |
| site* host sp | Site*brood sp | year*men.temp t-1 – t-6 |
| site* host sp * bm | Site*tree sp | year *max.temp t-1 – t-6 |
| site* host sp * score | Site*tree height | year *min.temp t-1 – t-6 |
| site* brood size | Site*tree height2 | year *mean.hum t-1 – t-6 |
| year* host sp *age | Site*p/a bush | year *hum2 t-1 – t-6 |
| year* host sp | Site* bush cover | year *hum14 t-1 – t-6 |
| year* host sp * bm | Site*height bush | year *rain t-1 – t-4 |
| year* host sp * score | Site*p/a grass | year *pref dens t-1 – t-6 |
| year* brood size | Site* grass cover | year **Ph.ruber* dens t-1 – t-6 |
| Rain t-1 – t-4* host sp * age | Site*height grass | year **Ph.sibilatrix* dens t-1 – t-6 |
| Rain t-1 – t-4* age | year*brood sp | year **Pi. sulphuratus* dens t-1 – t-6 |
| Rain t-1 – t-4* host sp | year *tree sp | year *L3 t-1 – t-6 |
| Temp min t-1 – t-6*host sp * age | year *tree height | rain*mean.temp t-1 – t-6 |
| Temp min t-1 – t-6* age | year *tree height2 | rain*max.temp t-1 – t-6 |
| Temp min t-1 – t-6*host sp | year *p/a bush | rain*min.temp t-1 – t-6 |
| Pref dens t0 – t-4*host sp *age | year * bush cover | host dens t-1 – t-6*rain t-1 – t-4 |
| Pref dens t0 – t-4*host sp | year *height bush | host dens t-1 – t-6*mean.temp t-1 – t-6 |
| Pref dens t0 – t-4*age | year *p/a grass | host dens t-1 – t-6*max.temp t-1 – t-6 |
| *Pi.sulphuratus* denst0–t-6*host.sp*age | year * grass cover | host dens t-1 – t-6*min.temp t-1 – t-6 |
| *Pi. sulphuratus*  dens t0 – t-6* age | year *height grass | pref dens t-1 – t-6*rain t-1 – t-4 |
| *Pi. sulphuratus* dens t0 – t-6*host sp. | Rain t-1 – t-4*brood sp | pref dens t-1 – t-6*mean.temp t-1 – t-6 |
| *Ph. ruber* denst0–t-6*host.sp*age | Rain t-1 – t-4*tree sp | pref dens t-1 – t-6*max.temp t-1 – t-6 |
| *Ph. ruber* dens t0 – t-6* age | Rain t-1 – t-4*tree height | pref dens t-1 – t-6*min.temp t-1 – t-6 |
| *Ph. ruber* dens t0 – t-6*host sp. | Rain t-1 – t-4*tree height2 | *Ph. ruber* denst-1 – t-6*rain t-1 – t-4 |
| Non passerine dens t0 – t-6* age | Rain t-1 – t-4*p/a bush | *Ph.ruber* dens t-1 – t-6*mean.temp t-1–t-6 |
| Non passerinedens t0 – t-6*host sp. | Rain t-1 – t-4* bush cover | *Ph. ruber* dens t-1 – t-6*max.temp t-1– t-6 |
| Non passerine denst0–t-6*host.sp*age | Rain t-1 – t-4*height bush | *Ph. ruber* dens t-1 – t-6*min.temp t-1 – t-6 |
| Non passerine dens t0 – t-6* age | Rain t-1 – t-4*p/a grass | *Ph. sibilatrix* denst-1 – t-6*rain t-1 – t-4 |
| Non passerine dens t0 – t-6*host sp. | Rain t-1 – t-4* grass cover | *Ph.sibilatrix* denst-1– t-6*mean.tempt-1–t-6 |
| Shannon’s index t0 – t-6* age | Rain t-1 – t-4*height grass | *Ph.sibilatrix* dens t-1–t-6*max.temp t-1–t-6 |
| Shannon’s index t0 – t-6*host sp. | Temp min t-1 – t-6*brood sp | *Ph.sibilatrix* dens t-1–t-6*min.temp t-1–t-6 |
| Shannon’s index t0–t-6*host.sp*age | Temp min t-1 – t-6*tree sp | *Pi.sulphuratus* denst-1 – t-6*rain t-1 – t-4 |
| Shannon’s index t0 – t-6* age | Temp min t-1 – t-6*tree height | *Pi.sulphuratus* dens t-1 – t-6*mean. temp t-1– t-6 |
| Shannon’s index t0 – t-6*host sp. | Temp min t-1 – t-6*tree height2 | *Pi.sulphuratus* dens t-1 – t-6*max. temp t-1 – t-6 |
|  | Temp min t-1 – t-6*p/a bush | *Pi.sulphuratus* dens t-1 – t-6*min. temp t-1 – t-6 |
|  | Temp min t-1 – t-6* bush cover |  |
|  | Temp min t-1 – t-6*height bush | Non passerinedens t-1 – t-6*rain t-1 – t-4 |
|  | Temp min t-1 – t-6 *p/a grass | Non passerinedens t-1 – t-6*mean. temp t-1– t-6 |
|  | Temp min t-1 – t-6* grass cover | Non passerinedens t-1 – t-6*max. temp t-1 – t-6 |
|  | Temp min t-1 – t-6*height grass | Non passerinedens t-1 – t-6*min. temp t-1 – t-6 |
|  |  | Non passerinedens t-1 – t-6*site |
|  | Pref dens t-0 – t-4* brood sp | Non passerinedens t-1 – t-6*year |
|  | Pref dens t-0 – t-4*tree sp |  |
|  | Pref dens t-0 – t-4*tree height | Shannon’s indext-1 – t-6*rain t-1 – t-4 |
|  | Pref dens t-0 – t-4*tree height2 | Shannon’s index t-1 – t-6*mean. temp t-1– t-6 |
|  | Pref dens t-0 – t-4*p/a bush | Shannon’s index t-1 – t-6*max. temp t-1 – t-6 |
|  | Pref dens t-0 – t-4* bush cover | Shannon’s index t-1 – t-6*min. temp t-1 – t-6 |
|  | Pref dens t-0 – t-4*height bush | Shannon’s indext-1 – t-6*site |
|  | Pref dens t-0 – t-4 *p/a grass | Shannon’s index t-1 – t-6*year |
|  | Pref dens t-0 – t-4* grass cover |  |
|  | Pref dens t-0 – t-4*height grass |  |
|  | *Pi. sulphuratus* dens t-0 – t-6 * brood sp |  |
|  | *Pi. sulphuratus* dens t-0 – t-6*tree sp |  |
|  | *Pi. sulphuratus* dens t-0 – t-6*tree height |  |
|  | *Pi. sulphuratus* dens t-0 – t-6*tree height2 |  |
|  | *Pi. sulphuratus* dens t-0 – t-6*p/a bush |  |
|  | *Pi. sulphuratus* dens t-0 – t-6* bush cover |  |
|  | *Pi. sulphuratus* dens t-0 – t-6*height bush |  |
|  | *Pi. sulphuratus* dens t-0 – t-6 *p/a grass |  |
|  | *Pi. sulphuratus* dens t-0 – t-6* grass cover |  |
|  | *Pi. sulphuratus* dens t-0 – t-6*height grass |  |
|  |  |  |
|  | Non passerinedens t-0 – t-6*tree height2 |  |
|  | Non passerinedens t-0 – t-6*p/a bush |  |
|  | Non passerinedens t-0 – t-6* bush cover |  |
|  | Non passerinedens t-0 – t-6*height bush |  |
|  | Non passerinedens t-0 – t-6 *p/a grass |  |
|  | Non passerinedens t-0 – t-6* grass cover |  |
|  | Non passerinedens t-0 – t-6*height grass |  |
|  |  |  |
|  | Shannon’s index t-0 – t-6*tree height2 |  |
|  | Shannon’s index t-0 – t-6*p/a bush |  |
|  | Shannon’s index t-0 – t-6* bush cover |  |
|  | Shannon’s index t-0 – t-6*height bush |  |
|  | Shannon’s index t-0 – t-6 *p/a grass |  |
|  | Shannon’s index t-0 – t-6* grass cover |  |
|  | Shannon’s index t-0 – t-6*height grass |  |
|  |  |  |
|  |  |  |
| *Potential confounders* | | |
| mean.temt0 t-4 | mean.temt0 t-4 |  |
| min.temt0 t-4 | mean.temt0 t-4 |
| max.temt0 t-4 | mean.temt0 t-4 |
| hum2 t0 t-4 | mean.temt0 t-4 |
| hum14 t0 t-4 | mean.temt0 t-4 |
| rain t0 t-4 | min.temt0 t-4 |
|  | max.temt0 t-4 |
| *Ph. ruber* dens t0 t-6 | hum2 t0 t-4 |
| *Ph. sibilatrix* denst0 t-6 | hum14t0 t-4 |
| *Pi. sulphuratus* denst0 t-6 | rain t0 t-4 |
| Pref dens t0 t-6 |  |
| Host den t0 t-6 | *Ph. ruber* dens t0 t-6 |
| Non passerine denst0; t-6 | *Ph. sibilatrix* dens t0 t-6 |
| Shannon’s index | *Pi. sulphuratus* dens t0 t-6 |
|  | pref dens t0 t-6 |
| Week and week2 | Host dens t0 t-6 |
|  | Non passerine denst0; t-6 |
| Height nest | Shannon’s index |
| External material of nest |  |
| o/c nest | Week and week2 |
|  |  |
| Brood size | Brood size |
|  | Presence/absence of parasite bird |
|  |  |  |
| Site | Site | Site |
| Year | Year | Year |
